# Supplementary material
Source: PubMed Central journal article supplement (PMC6736447)
Supplement: nqz139_supplemental_file.pdf [file nqz139_supplemental_file.pdf]

**Dietary quality and colonic mucosa-associated gut microbiome in humans**

Yanhong Liu, Nadim J. Ajami, Hashem B. El-Serag, Clark Hair, David Y. Graham, Donna L. White, Liang Chen, Zhensheng Wang, Sarah Plew, Jennifer Kramer, Rhonda Cole, Ruben Hernaez, Jason Hou, Nisreen Husain, Maria E. Jarbrink-Sehgal, Fasiha Kanwal, Gyanprakash Ketwaroo, Yamini Natarajan, Rajesh Shah, Maria Velez, Niharika Mallepally, Joseph F. Petrosino, Li Jiao

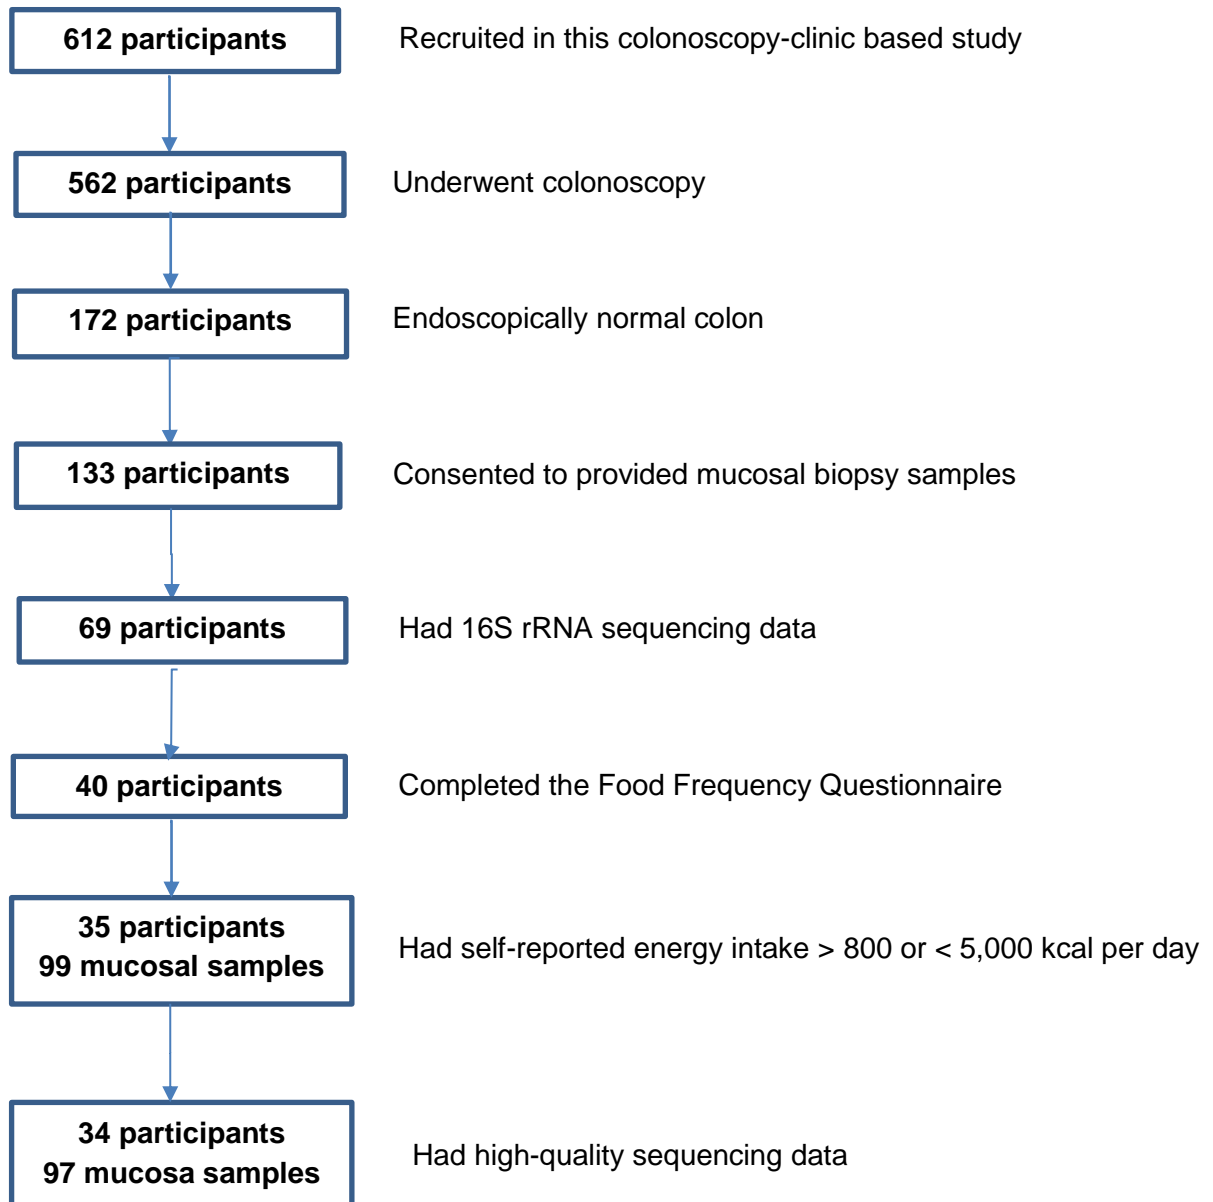

**Supplemental figure 1:** Flow chart of sample selection in our study

## Supplemental Material

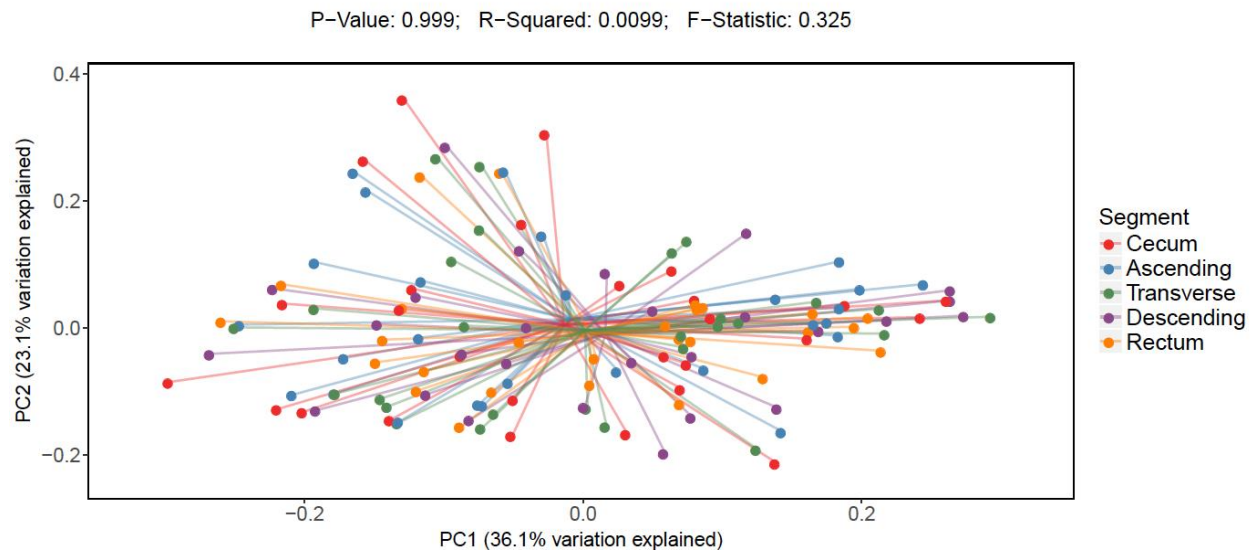

**Supplemental Figure 2.** Beta-diversities of the mucosa-associated gut bacterial communities (based on colonic biopsies collected from five segments of the colon of 27 individuals).

Supplemental Material

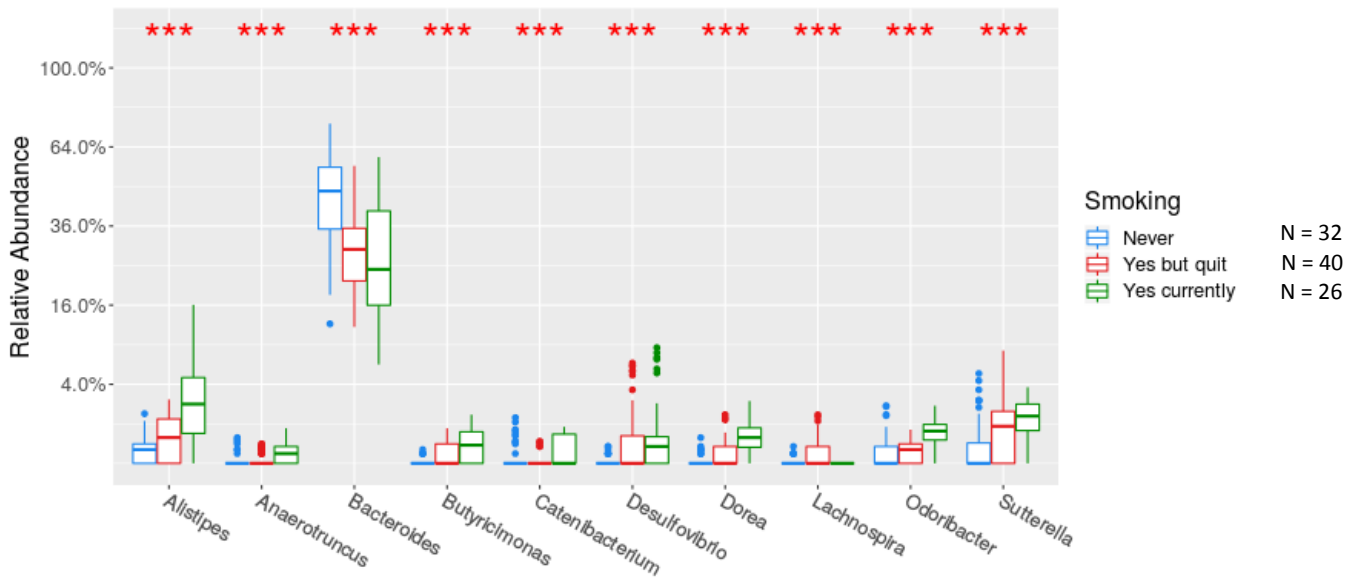

Supplemental figure 3 – A

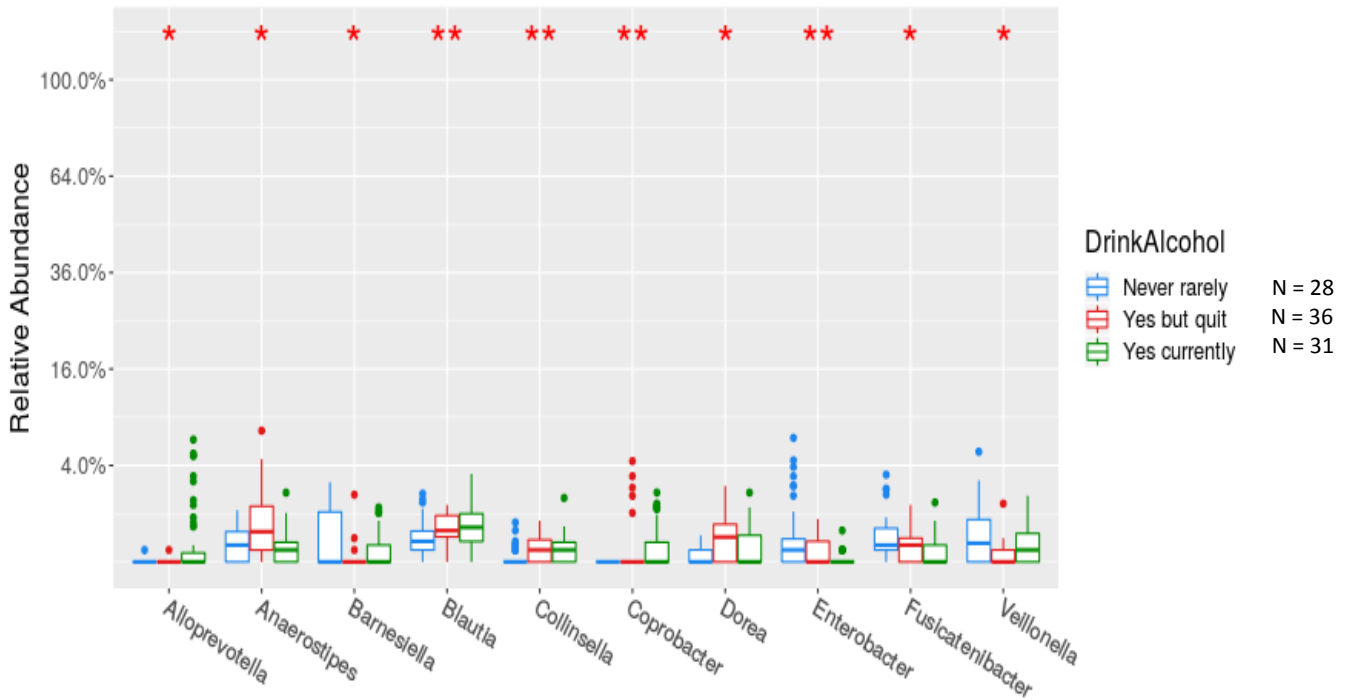

Supplemental figure 3 – B

### Supplemental Material

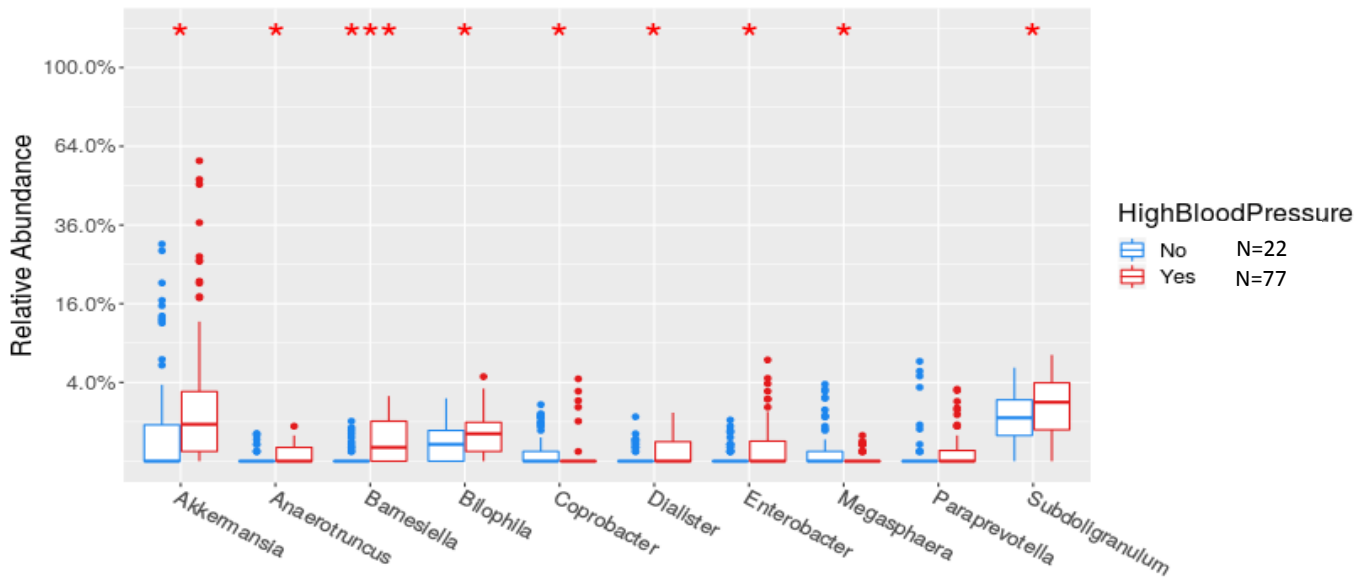

### Supplemental figure 3 – C

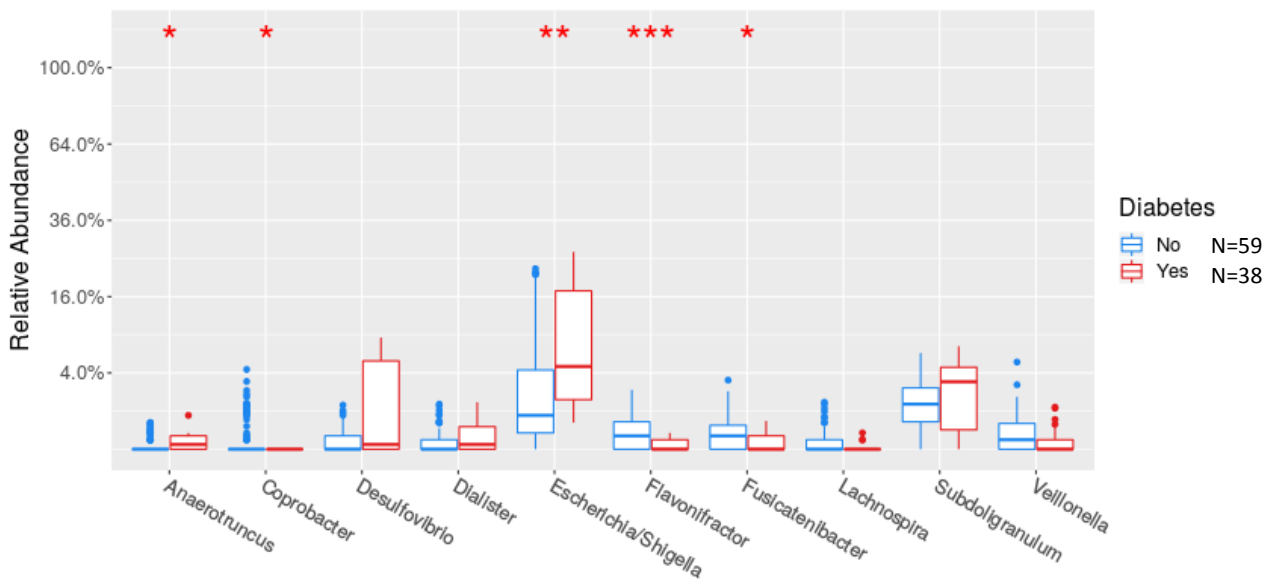

### Supplemental figure 3 – D

Supplemental Material

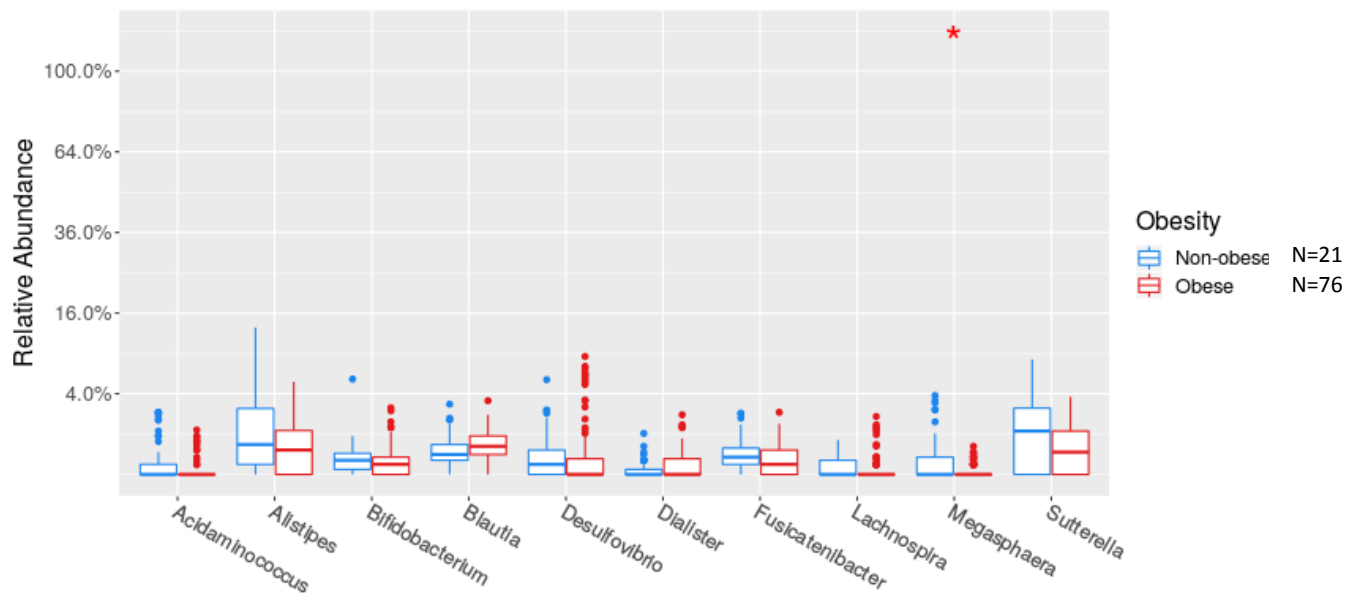

Supplemental figure 3 – E

**Supplemental Figure 3.** Relative abundance (%) of mostly differed bacterial genera (rank by  $P$  values) by smoking status (A), alcohol use (B), hypertension (C), diabetes (D), and obesity (E).

\*FDR  $P$  value < 0.05; \*\* FDR  $P$  value < 0.005; \*\*\* FDR  $P$  value < 0.0005

Supplemental Material

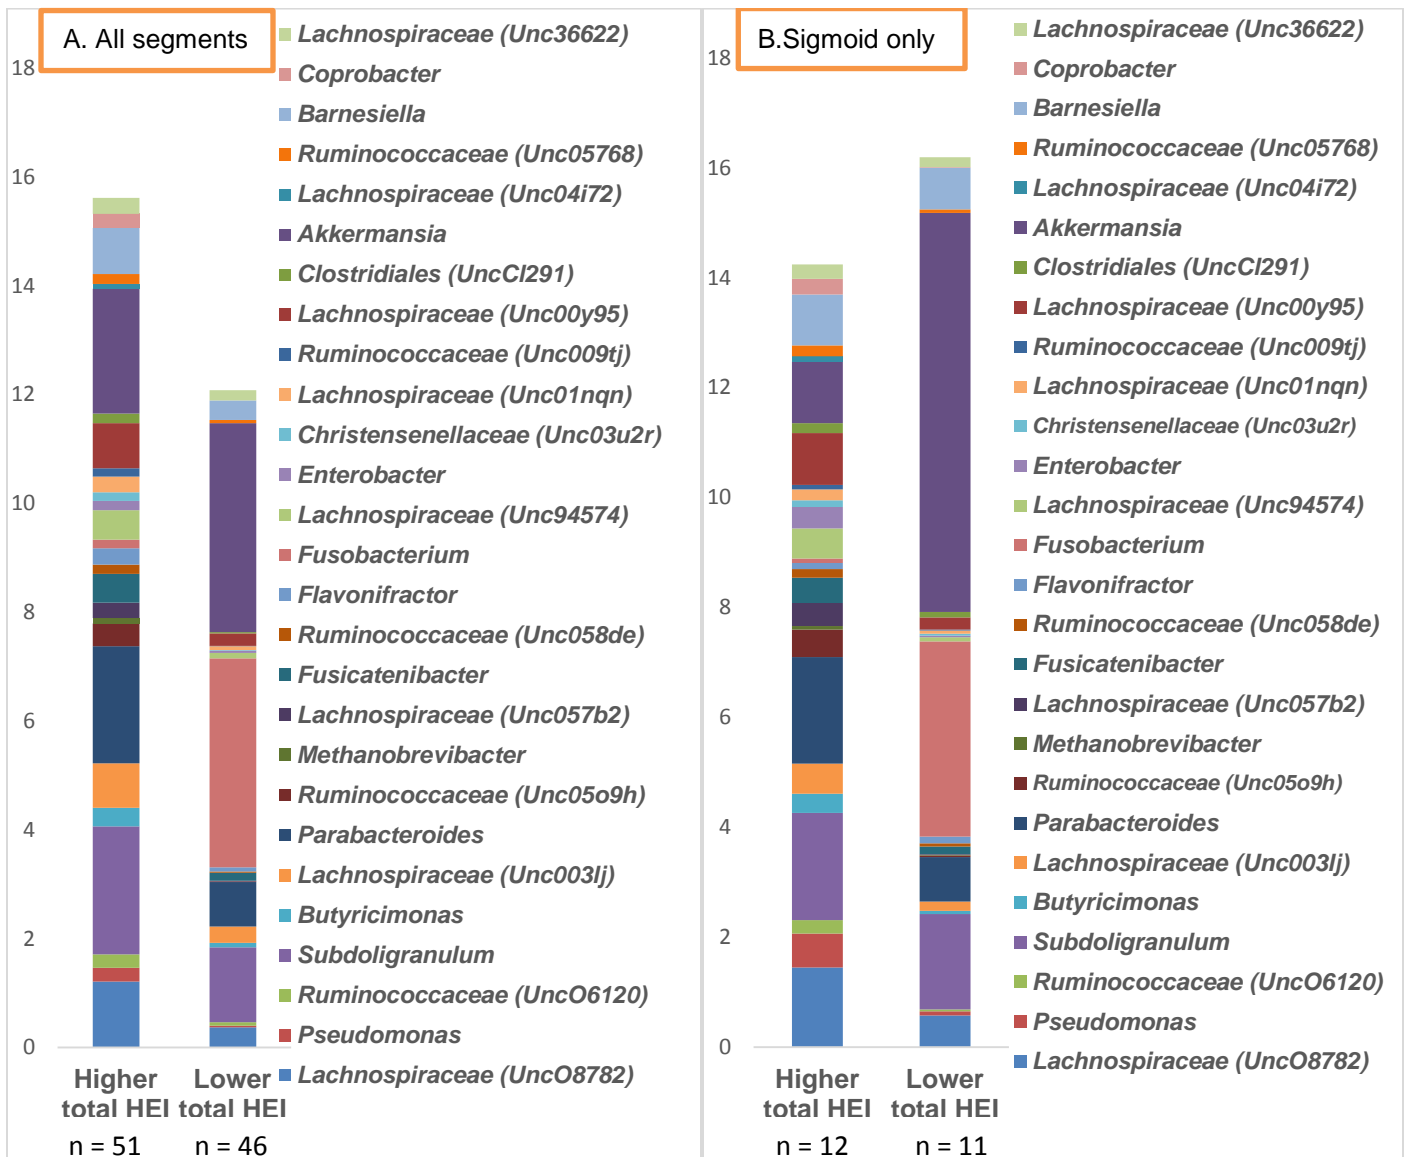

**Supplemental Figure 4.** Stacked bar chart of the relative abundance (Y axis) of the bacterial genera according higher vs. lower total HEI score using the sequencing data from all segments (97 biopsies from 34 participants) (panel A) and from sigmoid only (23 biopsies from 23 participants). Only the genera significantly differed in all segments (FDR-adjusted  $P$  values  $< 0.05$ ) were shown in the figure. Bacteria were ordered by  $P$  values. The bottom Lachnospiraceae (UncO8782) had the smallest adjusted  $P$  value and the Lachnospiraceae (UncO8782) had the largest  $P$  value.

Y axis: relative abundance (%)

Abbreviations: HEI: healthy eating index; Unc: unclassified.

Supplemental Material

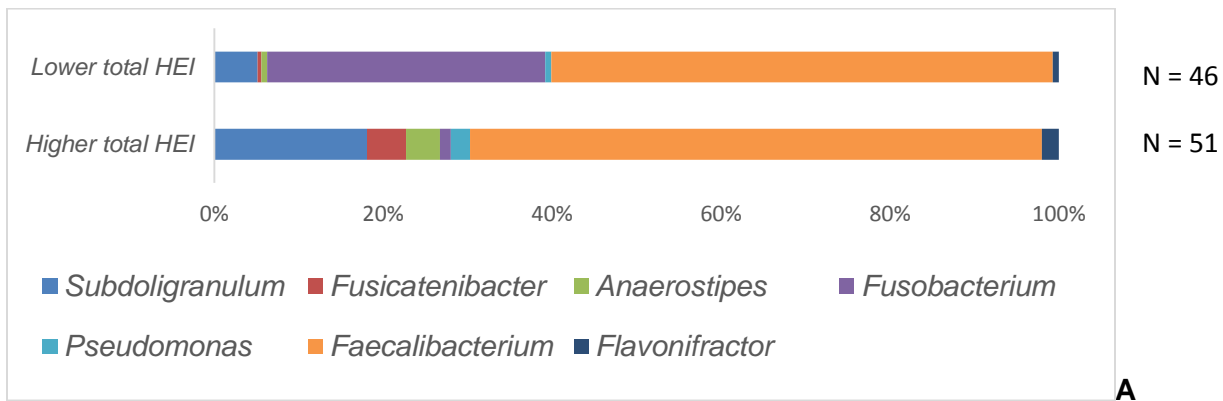

A

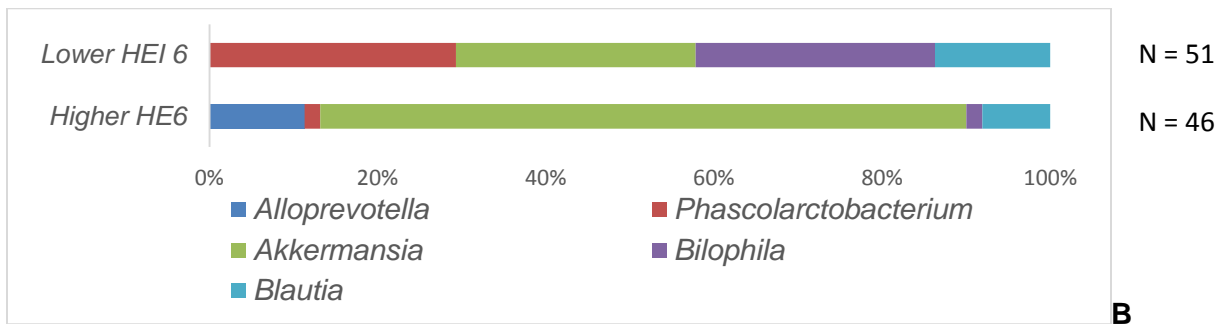

B

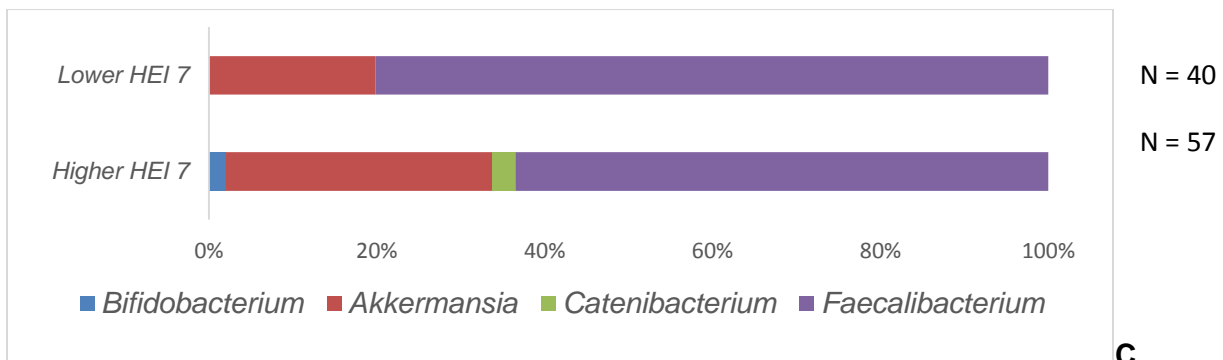

C

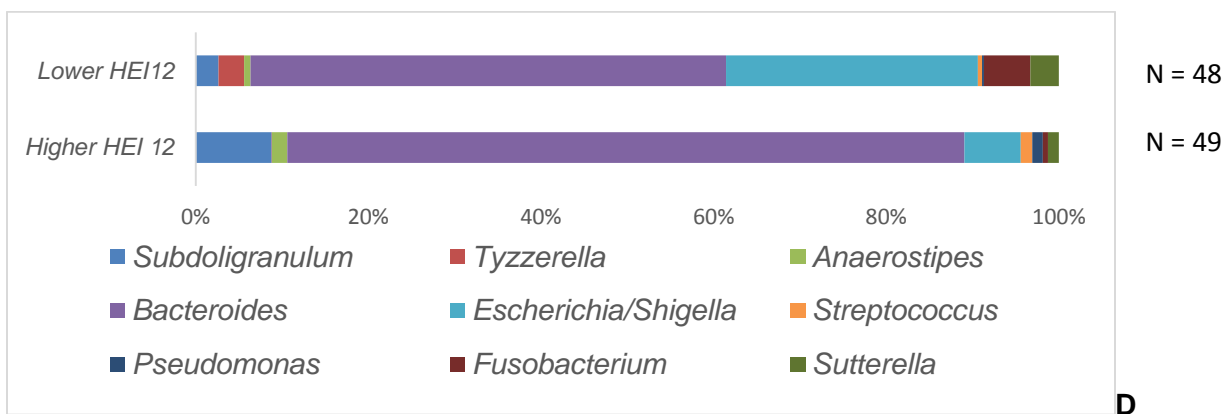

D

**Supplemental Figure 5.** Stacked bar chart of the relative abundance (% , X axis) of the bacterial genera according higher vs. lower total HEI score (panel A), whole grains (panel B), milk products and soy beverages (panel C), and SoFFAS (panel D) using the sequencing data from the single sequencing batch (56 biopsies



## Supplemental Material

from 13 participants). Only the genera significantly differed by dietary quality was shown (FDR-adjusted  $P$  values  $< 0.05$ ) were shown in this figure. Unclassified genera were not shown in the figure. Bacteria were ordered by  $P$  values. The bacteria on the left side had the smallest adjusted  $P$  value and the bacterium on the right side had the largest  $P$  value.

X axis: relative abundance (%).

Abbreviations: HEI: healthy eating index; SoFAAS: Calories from solid fats, alcoholic beverages, and added sugars
